# Supplementary material for: Racial and Ethnic Disparities in Health Care Usage and Death by Neighborhood Poverty Among Individuals With Congenital Heart Defects, 4 US Surveillance Sites, 2011 to 2013
Source: PubMed Central journal article supplement — J Am Heart Assoc. 2024 May 23;13(11):e033937. doi: 10.1161/JAHA.123.033937 (PMC11255642; doi:10.1161/jaha.123.033937), 2024-05-23
Supplement: JAH3-13-e033937-s001.pdf [file JAH3-13-e033937-s001.pdf]

# **SUPPLEMENTAL MATERIAL**

**Table S1. Characteristics of individuals with congenital heart defects, total, by age, and racial and ethnic group.**

| Characteristics                      | Age Group <sup>†</sup> |                          |                          |                               |                                       |                      |                    |                          |                          |                               |                                       |                      |
|--------------------------------------|------------------------|--------------------------|--------------------------|-------------------------------|---------------------------------------|----------------------|--------------------|--------------------------|--------------------------|-------------------------------|---------------------------------------|----------------------|
|                                      | 1-18 years             |                          |                          |                               |                                       | p-value <sup>§</sup> | 19-64 years        |                          |                          |                               |                                       | p-value <sup>§</sup> |
|                                      | Total<br>N=18951       | nHW<br>n=9657<br>(51.0%) | nHB<br>n=4896<br>(25.8%) | Hispanic<br>n=3708<br>(19.6%) | Other <sup>‡</sup><br>n=690<br>(3.6%) |                      | Total<br>N=12591   | nHW<br>n=8516<br>(67.6%) | nHB<br>n=2095<br>(16.6%) | Hispanic<br>n=1657<br>(13.2%) | Other <sup>‡</sup><br>n=323<br>(2.6%) |                      |
| N (%)                                | n (%) <sup>*</sup>     | n (%) <sup>*</sup>       | n (%) <sup>*</sup>       | n (%) <sup>*</sup>            | N (%)                                 | n (%) <sup>*</sup>   | n (%) <sup>*</sup> | n (%) <sup>*</sup>       | n (%) <sup>*</sup>       |                               |                                       |                      |
| <b>Site</b>                          |                        |                          |                          |                               |                                       |                      |                    |                          |                          |                               |                                       |                      |
| Georgia                              | 4480<br>(23.6)         | 1956<br>(20.2)           | 1833<br>(37.4)           | 470<br>(12.7)                 | 221<br>(32.0)                         | <b>&lt;0.001</b>     | 1590<br>(12.6)     | 898<br>(10.5)            | 582<br>(27.7)            | 52<br>(3.1)                   | 58<br>(18.0)                          | <b>&lt;0.001</b>     |
| North Carolina                       | 7311<br>(38.6)         | 4498<br>(46.6)           | 1707<br>(34.9)           | 852<br>(23.0)                 | 254<br>(36.8)                         |                      | 4519<br>(35.9)     | 3535<br>(41.5)           | 747<br>(35.7)            | 129<br>(7.8)                  | 108<br>(33.4)                         |                      |
| New York                             | 5967<br>(31.5)         | 2161<br>(22.4)           | 1344<br>(27.4)           | 2247<br>(60.6)                | 215<br>(31.2)                         |                      | 4273<br>(33.9)     | 2086<br>(24.5)           | 747<br>(35.7)            | 1287<br>(77.7)                | 153<br>(47.4)                         |                      |
| Utah                                 | 1193<br>(6.3)          | 1042<br>(10.8)           | 12<br>(0.3)              | 139<br>(3.7)                  | 0<br>(0.0)                            |                      | 2209<br>(17.6)     | 1997<br>(23.5)           | 19<br>(0.9)              | 189<br>(11.4)                 | <10<br>--                             |                      |
| <b>Sex</b>                           |                        |                          |                          |                               |                                       |                      |                    |                          |                          |                               |                                       |                      |
| Female                               | 8916<br>(47.1)         | 4348<br>(45.0)           | 2436<br>(49.7)           | 1779<br>(48.0)                | 353<br>(51.2)                         | <b>&lt;0.001</b>     | 6460<br>(51.3)     | 3947<br>(46.4)           | 1282<br>(61.2)           | 1055<br>(63.7)                | 176<br>(54.5)                         | <b>&lt;0.001</b>     |
| Male                                 | 10035<br>(52.9)        | 5309<br>(55.0)           | 2460<br>(50.3)           | 1929<br>(52.0)                | 337<br>(48.8)                         |                      | 6131<br>(48.7)     | 4569<br>(53.6)           | 813<br>(38.8)            | 602<br>(36.3)                 | 147<br>(45.5)                         |                      |
| <b>CHD Anatomic Severity</b>         |                        |                          |                          |                               |                                       |                      |                    |                          |                          |                               |                                       |                      |
| Severe                               | 4942<br>(26.1)         | 2536<br>(26.2)           | 1305<br>(26.7)           | 910<br>(24.5)                 | 191<br>(27.7)                         | <b>&lt;0.001</b>     | 2873<br>(22.8)     | 1952<br>(22.9)           | 524<br>(25.0)            | 320<br>(19.3)                 | 77<br>(23.8)                          | <b>&lt;0.001</b>     |
| Shunt                                | 6518<br>(34.4)         | 2827<br>(29.3)           | 1860<br>(38.0)           | 1545<br>(41.7)                | 286<br>(41.4)                         |                      | 2549<br>(20.2)     | 1336<br>(15.7)           | 592<br>(28.3)            | 531<br>(32.0)                 | 90<br>(27.9)                          |                      |
| Valve                                | 5527<br>(29.2)         | 3359<br>(34.8)           | 1167<br>(23.8)           | 879<br>(23.7)                 | 122<br>(17.7)                         |                      | 6532<br>(51.9)     | 4786<br>(56.2)           | 885<br>(42.2)            | 722<br>(43.6)                 | 139<br>(43.0)                         |                      |
| Shunt and Valve                      | 1964<br>(10.3)         | 935<br>(9.7)             | 564<br>(11.5)            | 374<br>(10.1)                 | 91<br>(13.2)                          |                      | 637<br>(5.1)       | 442<br>(5.2)             | 94<br>(4.5)              | 84<br>(5.1)                   | 17<br>(5.3)                           |                      |
| <b>Health Insurance<sup>  </sup></b> |                        |                          |                          |                               |                                       |                      |                    |                          |                          |                               |                                       |                      |
| Any public                           | 10825<br>(57.1)        | 3731<br>(38.6)           | 3623<br>(74.0)           | 3096<br>(83.5)                | 375<br>(54.4)                         | <b>&lt;0.001</b>     | 5246<br>(41.7)     | 2426<br>(28.5)           | 1364<br>(65.1)           | 1303<br>(78.6)                | 153<br>(47.4)                         | <b>&lt;0.001</b>     |
| Private                              | 6416<br>(33.9)         | 4853<br>(50.2)           | 912<br>(18.6)            | 430<br>(11.6)                 | 221<br>(32.0)                         |                      | 6145<br>(48.8)     | 5210<br>(61.2)           | 528<br>(25.2)            | 270<br>(16.3)                 | 137<br>(42.4)                         |                      |
| None                                 | 88<br>(0.5)            | 43<br>(0.5)              | 30<br>(0.6)              | 15<br>(0.4)                   | 0<br>(0.0)                            |                      | 222<br>(1.8)       | 105<br>(1.2)             | 57<br>(2.7)              | 52<br>(3.2)                   | <10<br>--                             |                      |
| Unknown                              | 1622<br>(8.5)          | 1030<br>(10.7)           | 331<br>(6.8)             | 167<br>(4.5)                  | 94<br>(13.6)                          |                      | 978<br>(7.8)       | 775<br>(9.1)             | 146<br>(7.0)             | 32<br>(1.9)                   | 25<br>(7.7)                           |                      |

| <b>Neighborhood median income (USD)</b>               |                 |                |                |                |               |                  |                 |                |                |                |               |                  |
|-------------------------------------------------------|-----------------|----------------|----------------|----------------|---------------|------------------|-----------------|----------------|----------------|----------------|---------------|------------------|
| <\$40,000                                             | 6455<br>(34.1)  | 1872<br>(19.4) | 2300<br>(47.0) | 2040<br>(55.0) | 243<br>(35.2) | <b>&lt;0.001</b> | 3548<br>(28.2)  | 1423<br>(16.7) | 1013<br>(48.3) | 999<br>(60.3)  | 113<br>(35.0) | <b>&lt;0.001</b> |
| \$40,000-\$75,000                                     | 10007<br>(52.8) | 5837<br>(60.4) | 2391<br>(48.8) | 1464<br>(39.5) | 315<br>(45.7) |                  | 7024<br>(55.8)  | 5305<br>(62.3) | 1007<br>(48.1) | 571<br>(34.5)  | 141<br>(43.6) |                  |
| >\$75,000                                             | 2489<br>(13.1)  | 1948<br>(20.2) | 205<br>(4.2)   | 204<br>(5.5)   | 132<br>(19.1) |                  | 2019<br>(16.0)  | 1788<br>(21.0) | 75<br>(3.6)    | 87<br>(5.2)    | 69<br>(21.4)  |                  |
| <b>Neighborhood poverty status</b>                    |                 |                |                |                |               |                  |                 |                |                |                |               |                  |
| Low poverty neighborhood (<25% households below FPL)  | 12315<br>(65.0) | 7719<br>(79.9) | 2547<br>(52.0) | 1613<br>(43.5) | 436<br>(63.2) | <b>&lt;0.001</b> | 8919<br>(70.8)  | 6965<br>(81.8) | 1040<br>(49.6) | 715<br>(43.2)  | 199<br>(61.6) | <b>&lt;0.001</b> |
| High poverty neighborhood (≥25% households below FPL) | 6636<br>(35.0)  | 1938<br>(20.1) | 2349<br>(48.0) | 2095<br>(56.5) | 254<br>(36.8) |                  | 3672<br>(29.2)  | 1551<br>(18.2) | 1055<br>(50.4) | 942<br>(56.8)  | 124<br>(38.4) |                  |
| <b>Healthcare utilization</b>                         |                 |                |                |                |               |                  |                 |                |                |                |               |                  |
| ≥1 Outpatient visits                                  | 17731<br>(93.6) | 8935<br>(92.5) | 4586<br>(93.7) | 3583<br>(96.6) | 627<br>(90.9) | <b>&lt;0.001</b> | 11621<br>(92.3) | 7795<br>(91.5) | 1946<br>(92.9) | 1592<br>(96.1) | 288<br>(89.2) | <b>&lt;0.001</b> |
| ≥1 Hospitalizations                                   | 9628<br>(36.6)  | 3156<br>(32.7) | 1875<br>(38.3) | 1574<br>(42.5) | 323<br>(46.8) | <b>&lt;0.001</b> | 6595<br>(52.4)  | 4162<br>(48.9) | 1224<br>(58.4) | 1025<br>(61.9) | 184<br>(57.0) | <b>&lt;0.001</b> |
| ≥1 Emergency department visits                        | 5980<br>(31.6)  | 2152<br>(22.3) | 1561<br>(31.9) | 2103<br>(56.7) | 164<br>(23.8) | <b>&lt;0.001</b> | 4798<br>(38.1)  | 2675<br>(31.4) | 892<br>(42.6)  | 1123<br>(67.8) | 108<br>(33.4) | <b>&lt;0.001</b> |
| <b>Mortality</b>                                      |                 |                |                |                |               |                  |                 |                |                |                |               |                  |
| Yes                                                   | 113<br>(0.6)    | 46<br>(0.5)    | 41<br>(0.8)    | 22<br>(0.6)    | <10<br>--     | ns               | 261<br>(2.1)    | 151<br>(1.8)   | 74<br>(3.5)    | 28<br>(1.7)    | <10<br>--     | <b>&lt;0.001</b> |

CHD = congenital heart defects; FPL = Federal Poverty Level; USD = United States dollar currency.

Cell sizes less than 10 are not displayed directly and are reported as '<10' per site-specific cell size suppression policy; cell size values of '0' are reported directly.

Statistically significant aOR values are bolded.

\* Column percentages reported in cells. Cell sizes less than 10 are not displayed directly and are reported as '<10' per site-specific cell size suppression policy; cell size values of '0' are reported directly.

† For 1-18 year olds, median age was 6 years, and for 19-64 year olds, median age was 38 years.

‡ Other racial and ethnic group includes Asian, American Indian/Native American, Native Hawaiian or Other Pacific Islander, and multi-racial. Unknown race excluded from analyses.

§ Chi-square tests compare racial and ethnic groups; analyses do not include "Total" column.

|| Insurance categorization: public defined as Medicaid or Medicare; private defined as private, other government, or other insurance; none defined as self-pay/uninsured; and unknown defined as unavailable, unknown, or no insurance indicated.

**Table S2. Associations between race and ethnicity and healthcare utilization and mortality, stratified by age and neighborhood poverty status among individuals with congenital heart defects.**

| Age Group<br>1-18 years  |                                                                             |                      |                    |                      |                               |                      |           |                      |                                                                            |                      |                    |                      |                               |                      |           |                |
|--------------------------|-----------------------------------------------------------------------------|----------------------|--------------------|----------------------|-------------------------------|----------------------|-----------|----------------------|----------------------------------------------------------------------------|----------------------|--------------------|----------------------|-------------------------------|----------------------|-----------|----------------|
|                          | High poverty neighborhood<br>(>25% households below Federal Poverty Level*) |                      |                    |                      |                               |                      |           |                      | Low poverty neighborhood<br>(≤25% households below Federal Poverty Level*) |                      |                    |                      |                               |                      |           |                |
|                          | Outpatient visits**                                                         |                      | Hospitalizations** |                      | Emergency Department visits** |                      | Mortality |                      | Outpatient visits**                                                        |                      | Hospitalizations** |                      | Emergency Department visits** |                      | Mortality |                |
|                          | n (%)                                                                       | aOR (95% CI)         | n (%)              | aOR (95% CI)         | n (%)                         | aOR (95% CI)         | n (%)     | aOR (95% CI)         | n (%)                                                                      | aOR (95% CI)         | n (%)              | aOR (95% CI)         | n (%)                         | aOR (95% CI)         | n (%)     | aOR (95% CI)   |
| Non-Hispanic White       | 1794 (92.6)                                                                 | 1.0 (referent)       | 648 (33.4)         | 1.0 (referent)       | 440 (22.7)                    | 1.0 (referent)       | <10 --    | 1.0 (referent)       | 7141 (92.5)                                                                | 1.0 (referent)       | 2508 (32.5)        | 1.0 (referent)       | 1712 (22.2)                   | 1.0 (referent)       | 41 (0.5)  | 1.0 (referent) |
| Non-Hispanic Black       | 2218 (94.4)                                                                 | <b>0.7 (0.5-0.9)</b> | 892 (38.0)         | <b>1.2 (1.0-1.3)</b> | 865 (36.8)                    | <b>1.3 (1.1-1.5)</b> | 21 (0.9)  | 2.3 (0.8-6.5)        | 2368 (93.0)                                                                | <b>0.8 (0.6-0.9)</b> | 983 (38.6)         | <b>1.2 (1.1-1.3)</b> | 696 (27.3)                    | <b>1.6 (1.4-1.9)</b> | 20 (0.8)  | 1.2 (0.7-2.1)  |
| Hispanic                 | 2031 (97.0)                                                                 | 0.8 (0.6-1.1)        | 883 (42.2)         | <b>1.4 (1.2-1.6)</b> | 1336 (63.8)                   | <b>1.9 (1.6-2.3)</b> | 13 (0.6)  | 1.6 (0.5-4.9)        | 1552 (96.2)                                                                | <b>1.5 (1.1-2.0)</b> | 691 (42.8)         | <b>1.4 (1.2-1.5)</b> | 767 (47.6)                    | <b>2.1 (1.8-2.4)</b> | <10 --    | 0.7 (0.4-1.6)  |
| Other‡                   | 226 (89.0)                                                                  | <b>0.4 (0.3-0.7)</b> | 128 (50.4)         | <b>1.8 (1.3-2.3)</b> | 70 (27.6)                     | <b>0.6 (0.4-0.9)</b> | <10 --    | 1.0 (0.1-9.1)        | 401 (92.0)                                                                 | 0.9 (0.6-1.4)        | 195 (44.7)         | <b>1.6 (1.3-1.9)</b> | 94 (21.6)                     | 1.2 (0.9-1.6)        | <10 --    | 1.2 (0.4-3.9)  |
| Age Group<br>19-64 years |                                                                             |                      |                    |                      |                               |                      |           |                      |                                                                            |                      |                    |                      |                               |                      |           |                |
|                          | High poverty neighborhood<br>(>25% households below Federal Poverty Level*) |                      |                    |                      |                               |                      |           |                      | Low poverty neighborhood<br>(≤25% households below Federal Poverty Level*) |                      |                    |                      |                               |                      |           |                |
|                          | Outpatient visits**                                                         |                      | Hospitalizations** |                      | Emergency Department visits** |                      | Mortality |                      | Outpatient visits**                                                        |                      | Hospitalizations** |                      | Emergency Department visits** |                      | Mortality |                |
|                          | n (%)                                                                       | aOR (95% CI)         | n (%)              | aOR (95% CI)         | n (%)                         | aOR (95% CI)         | n (%)     | aOR (95% CI)         | n (%)                                                                      | aOR (95% CI)         | n (%)              | aOR (95% CI)         | n (%)                         | aOR (95% CI)         | n (%)     | aOR (95% CI)   |
| Non-Hispanic White       | 1427 (92.0)                                                                 | 1.0 (referent)       | 827 (53.3)         | 1.0 (referent)       | 474 (30.6)                    | 1.0 (referent)       | 33 (2.1)  | 1.0 (referent)       | 6368 (91.4)                                                                | 1.0 (referent)       | 3335 (47.9)        | 1.0 (referent)       | 2201 (31.6)                   | 1.0 (referent)       | 118 (1.7) | 1.0 (referent) |
| Non-Hispanic Black       | 989 (93.7)                                                                  | <b>1.6 (1.1-2.3)</b> | 619 (58.7)         | 1.0 (0.9-1.2)        | 460 (43.6)                    | <b>1.3 (1.1-1.6)</b> | 42 (4.0)  | 1.4 (0.8-2.5)        | 957 (92.0)                                                                 | 1.0 (0.8-1.4)        | 605 (58.2)         | <b>1.2 (1.0-1.4)</b> | 432 (41.5)                    | <b>1.6 (1.3-1.8)</b> | 32 (3.1)  | 1.2 (0.8-1.9)  |
| Hispanic                 | 913 (96.9)                                                                  | <b>1.8 (1.1-3.0)</b> | 566 (60.1)         | 1.1 (0.9-1.4)        | 668 (70.9)                    | <b>1.5 (1.2-1.9)</b> | 14 (1.5)  | <b>0.5 (0.2-0.9)</b> | 679 (95.0)                                                                 | 1.2 (0.8-1.8)        | 459 (64.2)         | <b>1.8 (1.5-2.1)</b> | 455 (63.6)                    | <b>1.9 (1.6-2.3)</b> | 14 (2.0)  | 0.8 (0.4-1.4)  |
| Other‡                   | 116 (93.6)                                                                  | 1.2 (0.5-2.5)        | 80 (64.5)          | 1.4 (1.0-2.1)        | 49 (39.5)                     | 0.8 (0.5-1.2)        | <10 --    | 1.1 (0.3-3.7)        | 172 (86.4)                                                                 | 0.9 (0.6-1.4)        | 104 (52.3)         | 1.1 (1.1-1.3)        | 59 (29.7)                     | 0.8 (0.5-1.1)        | <10 --    | 1.4 (0.5-3.4)  |

aOR = adjusted odds ratio; CI = confidence interval; CHD = congenital heart defect.

Cell sizes less than 10 are not displayed directly and are reported as '<10' per site-specific cell size suppression policy; cell size values of '0' are reported directly.

Statistically significant aOR values are bolded.

\*Assessed based on individuals' ZIP Code Tabulation Area (ZCTA) from the 2014 American Community Survey (ACS) 5-year estimates, estimated across years 2010-2014 (U.S. Census Bureau, 2014).

\*\* Zero counts for visit types are not included; healthcare utilization visit categories are not mutually exclusive.

‡ Other racial and ethnic group includes Asian, American Indian/Native American, Native Hawaiian or Other Pacific Islander, and multi-racial. Unknown race excluded from analyses.

**Table S3. Characteristics of individuals with congenital heart defects, total and by racial and ethnic group, with unknown race included.**

| Characteristics              | Total<br>N=35888 | Non-Hispanic<br>White<br>n=18173<br>(50.6%) | Non-<br>Hispanic<br>Black<br>n=6991<br>(19.5%) | Hispanic<br>n=5365<br>(15.0%) | Other‡<br>n=1013<br>(2.8%) | Unknown<br>n=4346<br>(12.1%) | p-value§         |
|------------------------------|------------------|---------------------------------------------|------------------------------------------------|-------------------------------|----------------------------|------------------------------|------------------|
|                              | N (%)            | n (%)*                                      | n (%)*                                         | n (%)*                        | n (%)*                     | n (%)*                       |                  |
| <b>Site</b>                  |                  |                                             |                                                |                               |                            |                              |                  |
| Georgia                      | 8165 (22.8)      | 2854 (15.7)                                 | 2415 (34.5)                                    | 522 (9.7)                     | 279 (27.5)                 | 2095 (48.2)                  | <b>&lt;0.001</b> |
| North Carolina               | 12601 (35.1)     | 8033 (44.2)                                 | 2454 (35.1)                                    | 981 (18.3)                    | 362 (35.7)                 | 771 (17.7)                   |                  |
| New York                     | 10778 (30.0)     | 4247 (23.4)                                 | 2091 (29.9)                                    | 3534 (65.9)                   | 368 (36.3)                 | 538 (12.4)                   |                  |
| Utah                         | 4344 (12.1)      | 3039 (16.7)                                 | 31 (0.5)                                       | 328 (6.1)                     | <10 (--)                   | 942 (21.7)                   |                  |
| <b>Age† (years)</b>          |                  |                                             |                                                |                               |                            |                              |                  |
| 1-10                         | 14804 (41.2)     | 5815 (32.0)                                 | 3585 (51.3)                                    | 2765 (51.5)                   | 535 (52.8)                 | 2104 (48.4)                  | <b>&lt;0.001</b> |
| 11-18                        | 7497 (20.9)      | 3842 (21.2)                                 | 1311 (18.7)                                    | 943 (17.6)                    | 155 (15.3)                 | 1246 (28.7)                  |                  |
| 19-44                        | 8353 (23.3)      | 5076 (27.9)                                 | 1333 (19.1)                                    | 1096 (20.4)                   | 200 (19.8)                 | 648 (14.9)                   |                  |
| 45-64                        | 5234 (14.6)      | 3440 (18.9)                                 | 762 (10.9)                                     | 561 (10.5)                    | 123 (12.1)                 | 348 (8.0)                    |                  |
| Age (years)                  |                  |                                             |                                                |                               |                            |                              |                  |
| 1-18                         | 22301 (62.1)     | 9657 (53.1)                                 | 4896 (70.0)                                    | 3708 (69.1)                   | 690 (68.1)                 | 3350 (77.1)                  | <b>&lt;0.001</b> |
| 19-64                        | 13587 (37.9)     | 8516 (46.9)                                 | 2095 (30.0)                                    | 1657 (30.9)                   | 323 (31.9)                 | 996 (22.9)                   |                  |
| <b>Sex</b>                   |                  |                                             |                                                |                               |                            |                              |                  |
| Female                       | 17432 (48.6)     | 8295 (45.6)                                 | 3718 (53.2)                                    | 2834 (52.8)                   | 529 (52.2)                 | 2056 (47.3)                  | <b>&lt;0.001</b> |
| Male                         | 18456 (51.4)     | 9878 (54.4)                                 | 3273 (46.8)                                    | 2531 (47.2)                   | 484 (47.8)                 | 2290 (52.7)                  |                  |
| <b>CHD Anatomic Severity</b> |                  |                                             |                                                |                               |                            |                              |                  |
| Severe                       | 8693 (24.2)      | 4488 (24.7)                                 | 1829 (26.2)                                    | 1230 (22.9)                   | 268 (26.5)                 | 878 (20.2)                   | <b>&lt;0.001</b> |
| Shunt                        | 10609 (29.6)     | 4163 (22.9)                                 | 2452 (35.1)                                    | 2076 (38.7)                   | 376 (37.1)                 | 1542 (35.5)                  |                  |
| Valve                        | 13664 (38.1)     | 8145 (44.8)                                 | 2052 (29.3)                                    | 1601 (29.8)                   | 261 (25.8)                 | 1605 (36.9)                  |                  |
| Shunt and Valve              | 2922 (8.1)       | 1377 (7.6)                                  | 658 (9.4)                                      | 458 (8.6)                     | 108 (10.6)                 | 321 (7.4)                    |                  |

| <b>Health Insurance<sup>  </sup></b>                     |              |              |             |             |            |             |                  |
|----------------------------------------------------------|--------------|--------------|-------------|-------------|------------|-------------|------------------|
| Any public                                               | 17830 (49.7) | 6157 (33.9)  | 4987 (71.3) | 4399 (82.0) | 528 (52.1) | 1759 (40.5) | <b>&lt;0.001</b> |
| Private                                                  | 14791 (41.2) | 10063 (55.4) | 1440 (20.6) | 700 (13.0)  | 358 (35.3) | 2230 (51.3) |                  |
| None                                                     | 370 (1.0)    | 148 (0.8)    | 87 (1.3)    | 67 (1.3)    | <10 (--)   | 60 (1.4)    |                  |
| Unknown                                                  | 2897 (8.1)   | 1805 (9.9)   | 477 (6.8)   | 199 (3.7)   | 119 (11.7) | 297 (6.8)   |                  |
| <b>Neighborhood median income (USD)</b>                  |              |              |             |             |            |             |                  |
| <\$40,000                                                | 10922 (30.4) | 3295 (18.1)  | 3313 (47.4) | 3039 (56.7) | 356 (35.1) | 919 (21.2)  | <b>&lt;0.001</b> |
| \$40,000-\$75,000                                        | 19471 (54.3) | 11142 (61.3) | 3398 (48.6) | 2035 (37.9) | 456 (45.0) | 2440 (56.1) |                  |
| >\$75,000                                                | 5495 (15.3)  | 3736 (20.6)  | 280 (4.0)   | 291 (5.4)   | 201 (19.9) | 987 (22.7)  |                  |
| <b>Neighborhood poverty status</b>                       |              |              |             |             |            |             |                  |
| Low poverty neighborhood<br>(<25% households below FPL)  | 24430 (68.1) | 14684 (80.8) | 3587 (51.3) | 2328 (43.4) | 635 (62.7) | 3196 (73.5) | <b>&lt;0.001</b> |
| High poverty neighborhood<br>(≥25% households below FPL) | 11458 (31.9) | 3489 (19.2)  | 3404 (48.7) | 3037 (56.6) | 378 (37.3) | 1150 (26.5) |                  |
| <b>Healthcare utilization</b>                            |              |              |             |             |            |             |                  |
| ≥1 Outpatient visits                                     | 33381 (93.0) | 16730 (92.1) | 6532 (93.4) | 5175 (96.5) | 915 (90.3) | 4029 (92.7) | <b>&lt;0.001</b> |
| ≥1 Hospitalizations                                      | 14431 (40.2) | 7318 (40.3)  | 3099 (44.3) | 2599 (48.4) | 507 (50.1) | 908 (20.9)  | <b>&lt;0.001</b> |
| ≥1 Emergency Department visits                           | 11313 (31.5) | 4827 (26.6)  | 2453 (35.1) | 3226 (60.1) | 272 (26.9) | 535 (12.3)  | <b>&lt;0.001</b> |
| <b>Mortality</b>                                         |              |              |             |             |            |             |                  |
| Yes                                                      | 399 (1.1)    | 197 (1.1)    | 115 (1.6)   | 50 (0.9)    | 12 (1.2)   | 25 (0.6)    | <b>&lt;0.001</b> |

CHD = congenital heart defects; FPL = Federal Poverty Level; USD = United States dollar currency.

Cell sizes less than 10 are not displayed directly and are reported as '<10' per site-specific cell size suppression policy; cell size values of '0' are reported directly.

Statistically significant aOR values are bolded.

\* Column percentages reported in cells.

† Estimates for 1-10-year-olds based on three sites: five counties in metropolitan-Atlanta, GA; 11 counties in NY state; and statewide in NC; estimates for 11-18, 19-44, and 45-64-year-olds based on four sites: five counties in metropolitan-Atlanta, GA; 11 counties in NY; and statewide in NC and UT. Overall, median age was 13.0 years.

\* Other racial and ethnic group includes Asian, American Indian/Native American, Native Hawaiian or Other Pacific Islander, and multi-racial.

§ Chi-square tests compare racial and ethnic groups; analyses do not include "Total" column.

|| Insurance categorization: public defined as Medicaid or Medicare; private defined as private, other government, or other insurance; none defined as self-pay/uninsured; and unknown defined as unavailable, unknown, or no insurance indicated.

**Table S4. Associations between race and ethnicity and healthcare utilization and mortality, by neighborhood poverty status among individuals with congenital heart defects, with unknown race included.**

| <b>High poverty neighborhood<br/>(&gt;25% households below Federal Poverty Level*)</b> |                            |                      |                           |                      |                                      |                      |                  |                      |
|----------------------------------------------------------------------------------------|----------------------------|----------------------|---------------------------|----------------------|--------------------------------------|----------------------|------------------|----------------------|
|                                                                                        | <b>Outpatient visits**</b> |                      | <b>Hospitalizations**</b> |                      | <b>Emergency Department visits**</b> |                      | <b>Mortality</b> |                      |
|                                                                                        | <b>n (%)</b>               | <b>aOR (95% CI)</b>  | <b>n (%)</b>              | <b>aOR (95% CI)</b>  | <b>n (%)</b>                         | <b>aOR (95% CI)</b>  | <b>n (%)</b>     | <b>aOR (95% CI)</b>  |
| Non-Hispanic White                                                                     | 3221 (92.3)                | 1.0 (referent)       | 1475 (42.3)               | 1.0 (referent)       | 914 (26.2)                           | 1.0 (referent)       | 38 (1.1)         | 1.0 (referent)       |
| Non-Hispanic Black                                                                     | 3207 (94.2)                | 0.8 (0.7-1.0)        | 1511 (44.4)               | <b>1.1 (1.0-1.3)</b> | 1325 (38.9)                          | <b>1.3 (1.2-1.5)</b> | 63 (1.9)         | <b>1.7 (1.0-2.6)</b> |
| Hispanic                                                                               | 2944 (96.9)                | 1.0 (0.7-1.3)        | 1449 (47.7)               | <b>1.3 (1.2-1.5)</b> | 2004 (66.0)                          | <b>1.8 (1.5-2.0)</b> | 27 (0.9)         | 0.7 (0.4-1.3)        |
| Other‡                                                                                 | 342 (90.5)                 | <b>0.6 (0.4-0.9)</b> | 208 (55.0)                | <b>1.7 (1.3-2.1)</b> | 119 (31.0)                           | <b>0.7 (0.5-0.9)</b> | <10 --           | 1.0 (0.3-3.0)        |
| Unknown                                                                                | 1071 (93.1)                | 0.8 (0.6-1.1)        | 226 (19.6)                | <b>0.4 (0.4-0.5)</b> | 160 (13.9)                           | <b>0.4 (0.3-0.5)</b> | <10 --           | <b>0.3 (0.1-0.9)</b> |
| <b>Low poverty neighborhood<br/>(≤25% households below Federal Poverty Level*)</b>     |                            |                      |                           |                      |                                      |                      |                  |                      |
|                                                                                        | <b>Outpatient visits**</b> |                      | <b>Hospitalizations**</b> |                      | <b>Emergency Department visits**</b> |                      | <b>Mortality</b> |                      |
|                                                                                        | <b>n (%)</b>               | <b>aOR (95% CI)</b>  | <b>n (%)</b>              | <b>aOR† (95% CI)</b> | <b>n (%)</b>                         | <b>aOR (95% CI)</b>  | <b>n (%)</b>     | <b>aOR (95% CI)</b>  |
| Non-Hispanic White                                                                     | 13509 (92.0)               | 1.0 (referent)       | 5843 (39.8)               | 1.0 (referent)       | 3913 (26.7)                          | 1.0 (referent)       | 159 (1.1)        | 1.0 (referent)       |
| Non-Hispanic Black                                                                     | 3325 (92.7)                | <b>0.8 (0.7-1.0)</b> | 1588 (44.3)               | <b>1.2 (1.1-1.3)</b> | 1128 (31.5)                          | <b>1.7 (1.5-1.9)</b> | 52 (1.5)         | 1.2 (0.9-1.7)        |
| Hispanic                                                                               | 2231 (95.8)                | <b>1.4 (1.1-1.7)</b> | 1150 (49.4)               | <b>1.5 (1.3-1.6)</b> | 1222 (52.5)                          | <b>2.1 (1.9-2.3)</b> | 23 (1.0)         | 0.8 (0.5-1.2)        |
| Other‡                                                                                 | 573 (90.2)                 | 0.8 (0.6-1.1)        | 299 (47.1)                | <b>1.5 (1.2-1.7)</b> | 153 (24.1)                           | 1.1 (0.8-1.3)        | <10 --           | 1.5 (0.7-3.0)        |
| Unknown                                                                                | 2958 (92.6)                | <b>0.8 (0.7-0.9)</b> | 682 (21.3)                | <b>0.6 (0.5-0.7)</b> | 375 (11.7)                           | <b>0.6 (0.5-0.7)</b> | 21 (0.7)         | 0.9 (0.6-1.4)        |

aOR = adjusted odds ratio; CI = confidence interval; CHD = congenital heart defect.

Cell sizes less than 10 are not displayed directly and are reported as '<10' per site-specific cell size suppression policy; cell size values of '0' are reported directly.

Statistically significant aOR values are bolded.

\*Assessed based on individuals' ZIP Code Tabulation Area (ZCTA) from the 2014 American Community Survey (ACS) 5-year estimates, estimated across years 2010-2014 (U.S. Census Bureau, 2014).

\*\* Zero counts for visit types are not included; healthcare utilization visit categories are not mutually exclusive.

‡ Other racial and ethnic group includes Asian, American Indian/Native American, Native Hawaiian or Other Pacific Islander, and multi-racial.
